# Supplementary material for: TiN nanotube supported Ni catalyst Ni@TiN-NTs: experimental evidence of structure–activity relations in catalytically hydrolyzing ammonia borane for hydrogen evolution
Source: Royal Society of Chemistry journal article supplement (doi:10.1039/d0ra06920e), 2020-01-01
Supplement: d0ra06920e1.pdf [file d0ra06920e1.pdf]

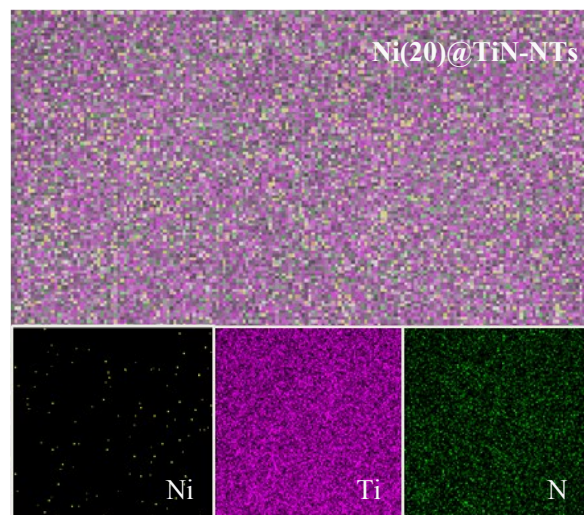

Fig.S1 SEM - mapping image of as-fabricated catalyst Ni(20)@TiN-NTs
